# Supplementary material
Source: PubMed Central journal article supplement (PMC1188011)

**a)**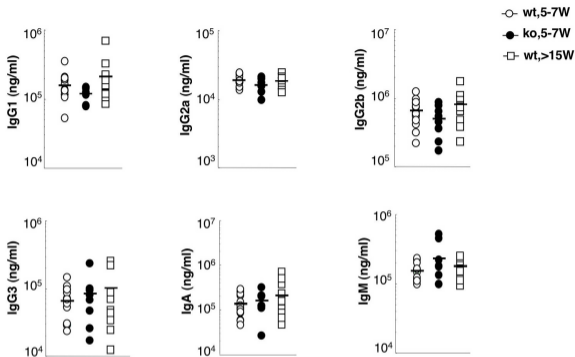**b)**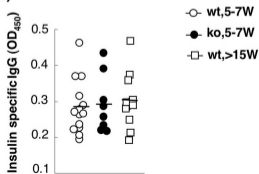

Supplement: pnas_0505497102_1.pdf [file pnas_0505497102_1.pdf]

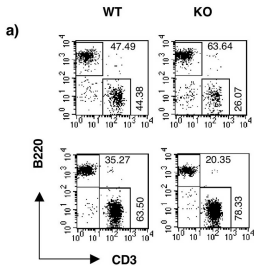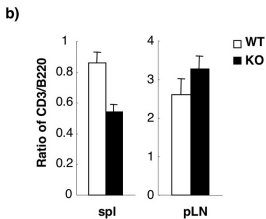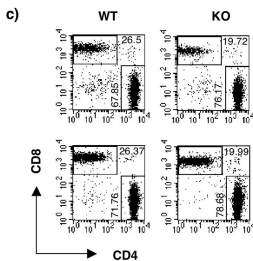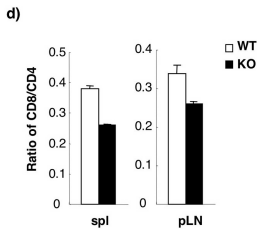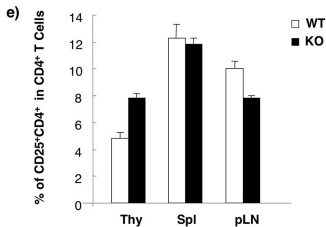

Supplement: pnas_0505497102_2.pdf [file pnas_0505497102_2.pdf]
